# Supplementary material for: Translation and validation of the Chinese version of the quality of life radiation therapy instrument and the head & neck module (QOL-RTI/H&N)
Source: PubMed Central journal article supplement (PMC4022371; doi:10.1186/1477-7525-12-51), 2014-04-14
Supplement: 1477-7525-12-51-S1.pdf [file 1477-7525-12-51-S1.pdf]

## Additional file 1

**Table A. the domain scores (Mean  $\pm$  SD) in patients with different gender, other disease and tumor site**

|                 | N   | Function        | Emotion         | Family          | General         | Pain            | Swallow         | Saliva          | Appearance      | Speech          | Taste           | Cough           |
|-----------------|-----|-----------------|-----------------|-----------------|-----------------|-----------------|-----------------|-----------------|-----------------|-----------------|-----------------|-----------------|
| Gender          |     |                 |                 |                 |                 |                 |                 |                 |                 |                 |                 |                 |
| Male            | 176 | 6.66 $\pm$ 1.77 | 6.36 $\pm$ 1.44 | 7.05 $\pm$ 1.25 | 7.20 $\pm$ 1.68 | 7.13 $\pm$ 2.92 | 6.89 $\pm$ 1.95 | 3.53 $\pm$ 2.94 | 6.45 $\pm$ 3.21 | 7.85 $\pm$ 2.72 | 5.87 $\pm$ 3.44 | 7.82 $\pm$ 2.78 |
| Female          | 62  | 6.38 $\pm$ 1.74 | 6.23 $\pm$ 1.26 | 6.76 $\pm$ 1.33 | 6.91 $\pm$ 1.55 | 7.02 $\pm$ 2.54 | 6.72 $\pm$ 1.99 | 3.60 $\pm$ 2.78 | 7.02 $\pm$ 2.94 | 7.83 $\pm$ 2.62 | 5.97 $\pm$ 3.28 | 7.60 $\pm$ 2.63 |
| <i>P</i>        |     | 0.283           | 0.516           | 0.123           | 0.235           | 0.803           | 0.547           | 0.875           | 0.224           | 0.966           | 0.839           | 0.582           |
| Other disease   |     |                 |                 |                 |                 |                 |                 |                 |                 |                 |                 |                 |
| Yes             | 49  | 6.71 $\pm$ 1.88 | 6.50 $\pm$ 1.23 | 7.08 $\pm$ 1.35 | 7.12 $\pm$ 1.62 | 7.61 $\pm$ 2.45 | 7.04 $\pm$ 2.00 | 3.61 $\pm$ 3.08 | 6.97 $\pm$ 2.95 | 8.28 $\pm$ 2.55 | 6.16 $\pm$ 3.49 | 8.07 $\pm$ 2.47 |
| No              | 189 | 6.55 $\pm$ 1.74 | 6.27 $\pm$ 1.42 | 6.95 $\pm$ 1.26 | 7.11 $\pm$ 1.68 | 6.97 $\pm$ 2.90 | 6.79 $\pm$ 1.95 | 3.54 $\pm$ 2.85 | 6.50 $\pm$ 3.20 | 7.72 $\pm$ 2.72 | 5.82 $\pm$ 3.37 | 7.68 $\pm$ 2.81 |
| <i>P</i>        |     | 0.573           | 0.300           | 0.517           | 0.970           | 0.158           | 0.438           | 0.882           | 0.348           | 0.209           | 0.534           | 0.378           |
| Tumor site      |     |                 |                 |                 |                 |                 |                 |                 |                 |                 |                 |                 |
| Nasopharynx     | 170 | 6.53 $\pm$ 1.71 | 6.34 $\pm$ 1.36 | 7.00 $\pm$ 1.28 | 7.09 $\pm$ 1.63 | 7.22 $\pm$ 2.66 | 6.73 $\pm$ 1.97 | 3.45 $\pm$ 2.87 | 6.72 $\pm$ 3.02 | 7.87 $\pm$ 2.56 | 5.75 $\pm$ 3.36 | 7.76 $\pm$ 2.59 |
| Non-nasopharynx | 68  | 6.73 $\pm$ 1.91 | 6.27 $\pm$ 1.48 | 6.92 $\pm$ 1.26 | 7.17 $\pm$ 1.71 | 6.82 $\pm$ 3.19 | 7.12 $\pm$ 1.90 | 3.80 $\pm$ 2.96 | 6.69 $\pm$ 3.45 | 7.78 $\pm$ 3.02 | 6.26 $\pm$ 3.48 | 7.76 $\pm$ 3.10 |
| <i>P</i>        |     | 0.432           | 0.727           | 0.637           | 0.736           | 0.324           | 0.173           | 0.398           | 0.343           | 0.820           | 0.289           | 1.000           |
